# Supplementary material
Source: ML conference proceedings conference paper supplement (https://proceedings.neurips.cc/paper_files/paper/2022/hash/d53538ba21c05fa361d2b21704172753-Abstract.html)
Supplement: Supplementary file 1 [file d53538ba21c05fa361d2b21704172753-Supplemental-Conference.pdf]

## A Appendix

### A.1 Proofs

In this section we restate and provide proofs of the statements made in the main text.

**Property 1.** For any  $\Pi \subseteq \mathbb{I}$ ,  $\mathcal{V} \subseteq \mathbb{V}$  and  $\mathcal{M} \subseteq \mathbb{M}$ , it follows that  $\mathcal{M}^k(\Pi, \mathcal{V}; 0) = \mathcal{M}^k(\Pi, \mathcal{V})$  and  $\mathcal{M}^\infty(\Pi; 0) = \mathcal{M}^\infty(\Pi)$ .

*Proof.* Any  $\tilde{m} \in \mathcal{M}^k(\Pi, \mathcal{V}; 0)$  satisfies  $\|\tilde{\mathcal{T}}_\pi^k v - \mathcal{T}_\pi^k v\| = 0 \forall \pi \in \Pi, \forall v \in \mathcal{V}$ . Similarly any  $\tilde{m} \in \mathcal{M}^k(\Pi, \mathcal{V})$  satisfies analogous equality constraints  $\tilde{\mathcal{T}}_\pi^k v = \mathcal{T}_\pi^k v \forall \pi \in \Pi, \forall v \in \mathcal{V}$ . Since  $\|\cdot\|$  is a norm, we know that  $\|\tilde{\mathcal{T}}_\pi^k v - \mathcal{T}_\pi^k v\| = 0 \iff \tilde{\mathcal{T}}_\pi^k v = \mathcal{T}_\pi^k v$ , hence  $\mathcal{M}^k(\Pi, \mathcal{V}; 0) = \mathcal{M}^k(\Pi, \mathcal{V})$ . The same logic applies to APVE classes.  $\square$

**Property 2.** For any  $\epsilon \in \bar{\mathbb{R}}^+$ ,  $\mathcal{M} \subseteq \bar{\mathcal{M}} \subseteq \mathbb{M}$ ,  $\Pi \subseteq \Pi' \subseteq \mathbb{I}$  and  $\mathcal{V} \subseteq \mathcal{V}' \subseteq \mathbb{V}$ , it follows that

$$\mathcal{M}^k(\Pi', \mathcal{V}'; \epsilon) \subseteq \mathcal{M}^k(\Pi, \mathcal{V}; \epsilon) \subseteq \bar{\mathcal{M}}^k(\Pi, \mathcal{V}; \epsilon). \quad (7)$$

*Proof.* An AVE class,  $\mathcal{M}^k(\Pi', \mathcal{V}'; \epsilon)$  satisfies a series of constraints of the form  $\|\tilde{\mathcal{T}}_\pi^k v - \mathcal{T}_\pi^k v\| \leq \epsilon$  for each pair of  $\pi, v \in \Pi' \times \mathcal{V}'$ . Considering another pair of sub-sets  $\Pi \subseteq \Pi'$  and  $\mathcal{V} \subseteq \mathcal{V}'$ , we can partition the first pair as follows:

$$\Pi' \times \mathcal{V}' = (\Pi' \setminus \Pi \times \mathcal{V}' \setminus \mathcal{V}) \uplus (\Pi' \setminus \Pi \times \mathcal{V}) \uplus (\Pi \times \mathcal{V}' \setminus \mathcal{V}) \uplus (\Pi \times \mathcal{V})$$

accordingly,

$$\begin{aligned} \mathcal{M}^k(\Pi', \mathcal{V}'; \epsilon) &= \mathcal{M}^k(\Pi' \setminus \Pi, \mathcal{V}' \setminus \mathcal{V}; \epsilon) \cap \mathcal{M}^k(\Pi' \setminus \Pi, \mathcal{V}; \epsilon) \cap \mathcal{M}^k(\Pi, \mathcal{V}' \setminus \mathcal{V}; \epsilon) \cap \mathcal{M}^k(\Pi, \mathcal{V}; \epsilon) \\ &\subseteq \mathcal{M}^k(\Pi, \mathcal{V}; \epsilon), \end{aligned}$$

satisfying the first subset relation in Eq. 7. For the next subset relation, we simply note that

$$\bar{\mathcal{M}}^k(\Pi, \mathcal{V}; \epsilon) = (\bar{\mathcal{M}} \setminus \mathcal{M})^k(\Pi, \mathcal{V}; \epsilon) \cup \mathcal{M}^k(\Pi, \mathcal{V}; \epsilon) \supseteq \mathcal{M}^k(\Pi, \mathcal{V}; \epsilon),$$

completing the proof.  $\square$

**Property 3.** For any  $\Pi \subseteq \mathbb{I}$ ,  $\mathcal{V} \subseteq \mathbb{V}$  and  $\epsilon, \epsilon' \in \bar{\mathbb{R}}^+$  such that  $\epsilon' \geq \epsilon$ , it follows that

$$\mathcal{M}^k(\Pi, \mathcal{V}; \epsilon) \subseteq \mathcal{M}^k(\Pi, \mathcal{V}; \epsilon'). \quad (8)$$

*Proof.* For any  $\tilde{m} \in \mathcal{M}^k(\Pi, \mathcal{V}; \epsilon)$  a number of AVE constraints are respected:  $\|\tilde{\mathcal{T}}_\pi^k v - \mathcal{T}_\pi^k v\| \leq \epsilon$  for each pair  $\pi, v \in \Pi \times \mathcal{V}$ . Since  $\epsilon' \geq \epsilon$ , it follows that  $\|\tilde{\mathcal{T}}_\pi^k v - \mathcal{T}_\pi^k v\| \leq \epsilon \leq \epsilon'$  as well and hence  $\tilde{m} \in \mathcal{M}^k(\Pi, \mathcal{V}; \epsilon')$ . Thus  $\mathcal{M}^k(\Pi, \mathcal{V}; \epsilon) \subseteq \mathcal{M}^k(\Pi, \mathcal{V}; \epsilon')$  as needed.  $\square$

**Proposition 1.** For any  $\epsilon \in \bar{\mathbb{R}}^+$ ,  $\Pi, \Pi' \subseteq \mathbb{I}$ ,  $\mathcal{V}, \mathcal{V}' \subseteq \mathbb{V}$  and  $k, K \in \mathbb{Z}^+$  there exists some  $\epsilon' \in \bar{\mathbb{R}}^+$  such that

$$\mathcal{M}^k(\Pi, \mathcal{V}; \epsilon) \subseteq \mathcal{M}^K(\Pi', \mathcal{V}'; \epsilon'). \quad (9)$$

Moreover, if  $\mathcal{M}, \mathcal{V}$  and  $\mathcal{V}'$  are bounded then  $\epsilon'$  is finite.

*Proof.* Denote  $v_{\max} = \max_{s \in \mathcal{S}, v \in \mathcal{V} \cup \mathcal{V}'} v(s)$ ,  $\tilde{r}_{\max} = \max_{s \in \mathcal{S}, a \in \mathcal{A}, \tilde{m} \in \mathcal{M}} r(s, a)$  and consider any  $\tilde{m} \in \mathcal{M}^k(\Pi, \mathcal{V}; \epsilon)$ . We can then write

$$\|\tilde{\mathcal{T}}_\pi^K v - \mathcal{T}_\pi^K v\| \leq \max_s |\tilde{\mathcal{T}}_\pi^K v(s)| + \max_s |\mathcal{T}_\pi^K v(s)| \leq 2 \max\{\tilde{r}_{\max}, r_{\max}\} \frac{1-\gamma^K}{1-\gamma} + \gamma^K v_{\max}$$

for any  $\pi \in \Pi'$ ,  $v \in \mathcal{V}'$  and  $\tilde{m} \in \mathcal{M}^k(\Pi, \mathcal{V}; \epsilon)$ .

Clearly, when  $\epsilon' = \infty$  the desired subset relation holds, as  $\mathcal{M}^K(\Pi', \mathcal{V}'; \infty) = \mathcal{M} \supseteq \mathcal{M}^k(\Pi, \mathcal{V}; \epsilon)$  for any choices of sets, orders and  $\epsilon$ . Additionally, when  $\mathcal{M}, \mathcal{V}$  and  $\mathcal{V}'$  are bounded, we know that  $\tilde{r}_{\max}$  and  $v_{\max}$  are finite. Thus, by selecting a finite  $\epsilon' > 2 \max\{\tilde{r}_{\max}, r_{\max}\} \frac{1-\gamma^K}{1-\gamma} + \gamma^K v_{\max}$ , we obtain  $\tilde{m} \in \mathcal{M}^K(\Pi', \mathcal{V}'; \epsilon')$  and thus  $\mathcal{M}^k(\Pi, \mathcal{V}; \epsilon) \subseteq \mathcal{M}^K(\Pi', \mathcal{V}'; \epsilon')$  as needed.  $\square$

**Proposition 2.** For any  $\tilde{m} \in \mathcal{M}^k(\Pi, \mathcal{V}; \epsilon)$  it follows that

$$\|v_{\tilde{\pi}_*} - v_*\| \leq 2 \cdot \mathcal{E}_\epsilon(\Pi, \mathcal{V}, k | \mathbb{I}, \infty),$$

where  $\tilde{\pi}_*$  is any optimal policy of  $\tilde{m}$ .

*Proof.* From Proposition 1, we know that a minimum tolerated error,  $\epsilon' = \mathcal{E}_\epsilon(\Pi, \mathcal{V}, k | \mathbb{I}, \infty)$ , exists such that  $\mathcal{M}^k(\Pi, \mathcal{V}; \epsilon) \subseteq \mathcal{M}^\infty(\mathbb{I}; \epsilon')$ . We can then consider the performance of models in  $\mathcal{M}^\infty(\mathbb{I}; \epsilon')$ . For any  $\tilde{m} \in \mathcal{M}^\infty(\mathbb{I}; \epsilon')$  we can write:

$$\begin{aligned} 0 &\geq \tilde{v}_{\pi_*}(s) - \tilde{v}_{\tilde{\pi}_*}(s) \\ &= (\tilde{v}_{\pi_*}(s) - v_{\pi_*}(s)) + (v_{\pi_*} - v_{\tilde{\pi}_*}(s)) + (v_{\tilde{\pi}_*}(s) - \tilde{v}_{\tilde{\pi}_*}(s)) \end{aligned} \quad (19)$$

for any  $s \in \mathcal{S}$  where  $\pi_*$  and  $\tilde{\pi}_*$  are arbitrary optimal policies in the environment and  $\tilde{m}$  respectively and  $\tilde{v}_{\pi}$  denotes the model's value of a policy  $\pi$ .

Since  $\tilde{m} \in \mathcal{M}^\infty(\mathbb{I}; \epsilon')$  we know the first and third terms are bounded below by  $-\epsilon'$ , giving:

$$\begin{aligned} 0 &\geq v_*(s) - v_{\tilde{\pi}_*}(s) - 2\epsilon' \\ \implies 2\epsilon' &\geq v_*(s) - v_{\tilde{\pi}_*}(s) \geq 0 \\ \implies \|v_* - v_{\tilde{\pi}_*}\| &\leq 2\epsilon', \end{aligned} \quad (20)$$

as needed.  $\square$

**Proposition 3.** For any  $\epsilon \in \bar{\mathbb{R}}^+$ ,  $\Pi \subseteq \mathbb{I}$ ,  $\mathcal{V} \subseteq \mathbb{V}$  such that  $v \in \mathcal{V} \implies \mathcal{T}_\pi v \in \mathcal{V} \forall \pi \in \Pi$  and  $k, K \in \mathbb{Z}^+$  such that  $k$  divides  $K$ , we have that

$$\mathcal{M}^k(\Pi, \mathcal{V}; \epsilon) \subseteq \mathcal{M}^K(\Pi, \mathcal{V}; \frac{\epsilon \cdot (1 - \gamma^K)}{1 - \gamma^k}). \quad (10)$$

*Proof.* Let  $K = nk$ , and consider a model  $\tilde{m} \in \mathcal{M}^k(\Pi, \mathcal{V}; \epsilon)$ . It follows for any  $\pi \in \Pi$  and  $v \in \mathcal{V}$  that

$$\begin{aligned} \|\tilde{\mathcal{T}}_\pi^K v - \mathcal{T}_\pi^K v\| &= \|\tilde{\mathcal{T}}_\pi^k \tilde{\mathcal{T}}_\pi^{K-k} v - \mathcal{T}_\pi^k \mathcal{T}_\pi^{K-k} v\| \\ &= \|\tilde{\mathcal{T}}_\pi^k \tilde{\mathcal{T}}_\pi^{K-k} v - \mathcal{T}_\pi^k \mathcal{T}_\pi^{K-k} v + \tilde{\mathcal{T}}_\pi^k \mathcal{T}_\pi^{K-k} v - \tilde{\mathcal{T}}_\pi^k \tilde{\mathcal{T}}_\pi^{K-k} v\| \\ &\leq \|\tilde{\mathcal{T}}_\pi^k \mathcal{T}_\pi^{K-k} v - \mathcal{T}_\pi^k \mathcal{T}_\pi^{K-k} v\| + \|\tilde{\mathcal{T}}_\pi^k \tilde{\mathcal{T}}_\pi^{K-k} v - \tilde{\mathcal{T}}_\pi^k \mathcal{T}_\pi^{K-k} v\| \\ &\stackrel{(1)}{\leq} \epsilon + \|\tilde{\mathcal{T}}_\pi^k \tilde{\mathcal{T}}_\pi^{K-k} v - \tilde{\mathcal{T}}_\pi^k \mathcal{T}_\pi^{K-k} v\| \\ &\stackrel{(2)}{\leq} \epsilon + \gamma^k \|\tilde{\mathcal{T}}_\pi^{K-k} v - \mathcal{T}_\pi^{K-k} v\| \end{aligned} \quad (21)$$

where (1) follows from the assumption on  $\mathcal{V}$  and (2) follows from the fact that  $\tilde{\mathcal{T}}_\pi$  is a contraction. Next, using induction we can say that:

$$\begin{aligned} \|\tilde{\mathcal{T}}_\pi^K v_\pi - \mathcal{T}_\pi^K v_\pi\| &\leq \epsilon \cdot (1 + \gamma^k + \gamma^{2k} + \dots + \gamma^{(n-1)k}) \\ &= \epsilon \cdot \sum_{t=0}^{n-1} \gamma^{kt} \\ &= \epsilon \cdot \frac{1 - (\gamma^k)^n}{1 - \gamma^k} \\ &= \epsilon \cdot \frac{1 - \gamma^K}{1 - \gamma^k} \end{aligned} \quad (22)$$

where the last equality follows because  $K = nk$ .

This suffices to show that  $\tilde{m} \in \mathcal{M}^K(\Pi, \mathcal{V}; \epsilon \cdot \frac{1 - \gamma^K}{1 - \gamma^k})$  and thus:  $\mathcal{M}^k(\Pi, \mathcal{V}; \epsilon) \subseteq \mathcal{M}^K(\Pi, \mathcal{V}; \epsilon \cdot \frac{1 - \gamma^K}{1 - \gamma^k})$  as needed.  $\square$

**Corollary 1.** For any set of policies  $\Pi \subseteq \mathbb{I}$ , set of functions  $\mathcal{V} \subseteq \mathbb{V}$  such that  $\{v_\pi : \pi \in \Pi\} \subseteq \mathcal{V}$  and  $k \in \mathbb{Z}^+$ , it follows that

$$\mathcal{M}^k(\Pi, \mathcal{V}; \epsilon) \subseteq \mathcal{M}^\infty(\Pi; \frac{\epsilon}{1 - \gamma^k}). \quad (11)$$

*Proof.*

$$\mathcal{M}^k(\Pi, \mathcal{V}; \epsilon) = \bigcap_{\pi \in \Pi} \bigcap_{v \in \mathcal{V}} \mathcal{M}^k(\{\pi\}, \{v\}; \epsilon) \subseteq \bigcap_{\pi \in \Pi} \mathcal{M}^k(\{\pi\}, \{v_\pi\}; \epsilon) \quad (23)$$

where the subset-relation holds from our assumption that  $\{v_\pi : \pi \in \Pi\} \subseteq \mathcal{V}$ .

Next we examine  $\tilde{m} \in \mathcal{M}^k(\{\pi\}, \{v_\pi\}; \epsilon)$  for individual  $\pi \in \Pi$ . We know that for any such model:

$$\begin{aligned} \|\tilde{\mathcal{T}}_\pi^{nk} v_\pi - v_\pi\| &\leq \|\tilde{\mathcal{T}}_\pi^{nk} v_\pi - \tilde{\mathcal{T}}_\pi^k v_\pi\| + \|\tilde{\mathcal{T}}_\pi^k v_\pi - v_\pi\| \\ &\leq \gamma^k \|\tilde{\mathcal{T}}_\pi^{(n-1)k} v_\pi - v_\pi\| + \epsilon. \end{aligned}$$

By repeatedly applying this inequality we can obtain:

$$\|\tilde{\mathcal{T}}_\pi^{nk} v_\pi - v_\pi\| \leq \sum_{t=0}^{n-1} \epsilon \cdot \gamma^{(tk)} = \epsilon \cdot \frac{1-\gamma^{nk}}{1-\gamma^k}.$$

Next, from the continuity of  $\|\cdot\|$ , we can take limits to obtain:

$$\epsilon \cdot \frac{1}{1-\gamma^k} \geq \lim_{n \rightarrow \infty} \|\tilde{\mathcal{T}}_\pi^{nk} v_\pi - v_\pi\| = \|\lim_{n \rightarrow \infty} \tilde{\mathcal{T}}_\pi^{nk} v_\pi - v_\pi\| = \|\tilde{v}_\pi - v_\pi\|,$$

giving us that  $\mathcal{M}^k(\{\pi\}, \{v_\pi\}; \epsilon) \subseteq \mathcal{M}^\infty(\{\pi\}; \epsilon \cdot \frac{1}{1-\gamma^k})$ . We can plug this result back into Eq. 23 to obtain:

$$\mathcal{M}^k(\Pi, \mathcal{V}; \epsilon) \subseteq \bigcap_{\pi \in \Pi} \mathcal{M}^k(\{\pi\}, \{v_\pi\}; \epsilon) \subseteq \bigcap_{\pi \in \Pi} \mathcal{M}^\infty(\{\pi\}; \epsilon \cdot \frac{1}{1-\gamma^k}) = \mathcal{M}^\infty(\Pi; \epsilon \cdot \frac{1}{1-\gamma^k}),$$

as needed.  $\square$

**Proposition 4.** *For any set of policies  $\Pi \subseteq \mathbb{P}$ , set of functions  $\mathcal{V} \in \mathbb{V}$ ,  $c > 1$  and error  $\epsilon \in \bar{\mathbb{R}}^+$ , we have*

$$\mathcal{M}^k(\Pi, c\text{-vspan}(\mathcal{V}); \epsilon) \subseteq \mathcal{M}^k(\Pi, \mathcal{V}; \epsilon) \subseteq \mathcal{M}^k(\Pi, c\text{-vspan}(\mathcal{V}); c \cdot \epsilon). \quad (13)$$

*Proof.* Clearly,  $\mathcal{V} \subseteq c\text{-vspan}(\mathcal{V})$  and thus  $\mathcal{M}^k(\Pi, c\text{-vspan}(\mathcal{V}); \epsilon) \subseteq \mathcal{M}^k(\Pi, \mathcal{V}; \epsilon)$ . We now prove that  $\mathcal{M}^k(\Pi, \mathcal{V}; \epsilon) \subseteq \mathcal{M}^k(\Pi, \mathcal{V}; c \cdot \epsilon)$ . We first consider any  $\tilde{m} \in \mathcal{M}^k(\Pi, \mathcal{V}; \epsilon)$  and  $v' \in c\text{-vspan}(\mathcal{V})$ . Since  $v' \in c\text{-vspan}(\mathcal{V})$  we can write  $v' = \sum_{i=1}^n \alpha_i v_i$  where  $v_i \in \mathcal{V}$  for each  $i$  and  $\sum_{i=1}^n |\alpha_i| \leq c$ . From here we observe:

$$\begin{aligned} \|\tilde{\mathcal{T}}_\pi^k v' - \mathcal{T}_\pi^k v'\| &= \|\tilde{\mathcal{T}}_\pi^k \left( \sum_{i=1}^n \alpha_i v_i \right) - \mathcal{T}_\pi^k \left( \sum_{i=1}^n \alpha_i v_i \right)\| \\ &\leq \left\| \sum_{i=1}^n \alpha_i (\tilde{\mathcal{T}}_\pi^k v_i - \mathcal{T}_\pi^k v_i) \right\| \\ &\leq \sum_{i=1}^n |\alpha_i| \|\tilde{\mathcal{T}}_\pi^k v_i - \mathcal{T}_\pi^k v_i\| \\ &\leq \sum_{i=1}^n |\alpha_i| \epsilon \\ &\leq c \cdot \epsilon \end{aligned} \quad (24)$$

which shows that  $\mathcal{M}^k(\Pi, c\text{-vspan}(\mathcal{V}); c \cdot \epsilon)$  as needed.  $\square$

**Corollary 2.** *When either  $c = 1$  or  $\epsilon = 0$ , for any  $\Pi \subseteq \mathbb{P}$ ,  $\mathcal{V} \subseteq \mathbb{V}$  it follows that*

$$\mathcal{M}^k(\Pi, \mathcal{V}; \epsilon) = \mathcal{M}^k(\Pi, c\text{-vspan}(\mathcal{V}); \epsilon). \quad (14)$$

*Proof.* The proof follows directly from Proposition 4. When either  $c \in \{0, 1\}$  the left-most and right-most terms in Eq. 13 are equal, squeezing  $\mathcal{M}^k(\Pi, \mathcal{V}; \epsilon) = \mathcal{M}^k(\Pi, c\text{-vspan}(\mathcal{V}); \epsilon)$  as needed.  $\square$

**Proposition 5.**

1. (**Asymmetry**) For any  $\mathcal{V} \subseteq \mathcal{V}' \subseteq \mathcal{V}'' \subseteq \mathbb{V}$  it follows that

$$0 = \beta(\mathcal{V}|\mathcal{V}) \leq \beta(\mathcal{V}|\mathcal{V}') \leq \beta(\mathcal{V}|\mathcal{V}'') \quad \text{and} \quad 0 = \beta(\mathcal{V}''|\mathcal{V}'') \leq \beta(\mathcal{V}'|\mathcal{V}'') \leq \beta(\mathcal{V}|\mathcal{V}'').$$

2. (**Convex, Compact  $\mathcal{V}$** ) When  $\mathcal{V}$  is convex and compact it follows that

$$\beta(\mathcal{V}|\mathcal{V}') = \beta(\mathcal{V}|\text{1-vspan}(\mathcal{V}')).$$

*Proof.*

1. Recall  $\beta(\mathcal{V}|\mathcal{V}') = \max_{v' \in \mathcal{V}'} \min_{v \in \mathcal{V}} \|v' - v\|$ . Increasing the size of  $\mathcal{V}'$  means that more elements can be maximized over, thereby increasing  $\beta(\mathcal{V}|\mathcal{V}')$ . Similarly, increasing the size of  $\mathcal{V}$  means that more elements can be minimized over, thereby decreasing  $\beta(\mathcal{V}|\mathcal{V}')$ . When  $\mathcal{V} = \mathcal{V}'$ , we know that

$$0 \leq \beta(\mathcal{V}|\mathcal{V}') = \max_{v' \in \mathcal{V}'} \min_{v \in \mathcal{V}} \|v' - v\| \leq \max_{v' \in \mathcal{V}'} \|v' - v'\| = 0,$$

where second inequality follows since  $\mathcal{V} = \mathcal{V}'$ .

2. We begin by considering the function  $g(v') = \min_{v \in \mathcal{V}} \|v - v'\|$ . We begin by showing that this function is convex. Consider  $v'_1, v'_2 \in \mathcal{V}'$  and denote  $v_1 = \operatorname{argmin}_{v \in \mathcal{V}} \|v - v'_1\|$  and  $v_2 = \operatorname{argmin}_{v \in \mathcal{V}} \|v - v'_2\|$ . Then for any  $\lambda \in [0, 1]$  we can write:

$$\begin{aligned} \lambda g(v'_1) + (1 - \lambda)g(v'_2) &= \lambda \|v'_1 - v_1\| + (1 - \lambda)\|v'_2 - v_2\| \\ &\geq \|(\lambda v'_1 + (1 - \lambda)v'_2) - (\lambda v_1 + (1 - \lambda)v_2)\| \end{aligned} \quad (25)$$

since  $\mathcal{V}$  is convex  $(\lambda v_1 + (1 - \lambda)v_2) \in \mathcal{V}$ , thus:

$$\begin{aligned} \|(\lambda v'_1 + (1 - \lambda)v'_2) - (\lambda v_1 + (1 - \lambda)v_2)\| &\geq \min_{v \in \mathcal{V}} \|(\lambda v'_1 + (1 - \lambda)v'_2) - v\| \\ &= g(\lambda v'_1 + (1 - \lambda)v'_2) \end{aligned} \quad (26)$$

which suffices to show that  $g$  is a convex function.

Next we consider any element  $v' \in \text{1-vspan}(\mathcal{V}')$  such that  $v' = \sum_i \alpha_i v'_i$  with  $\sum_i \alpha_i = 1$  and  $\alpha_i \geq 0$  for all  $i$ . We can then write:

$$g(v') = g\left(\sum_i \alpha_i v'_i\right) \leq \sum_i \alpha_i g(v'_i) \leq \max_i g(v'_i) \leq \max_{v' \in \mathcal{V}'} g(v') = \beta(\mathcal{V}|\mathcal{V}') \quad (27)$$

Since  $g(v') \leq \beta(\mathcal{V}|\mathcal{V}')$  for every  $v' \in \text{1-vspan}(\mathcal{V}')$  it then follows that

$$\beta(\mathcal{V}|\text{1-vspan}(\mathcal{V}')) = \max_{v' \in \text{1-vspan}(\mathcal{V}')} g(v') \leq \beta(\mathcal{V}|\mathcal{V}'). \quad (28)$$

We obtain the reverse equality by noting that  $\mathcal{V}' \subseteq \text{1-vspan}(\mathcal{V}')$  and thus  $\beta(\mathcal{V}|\mathcal{V}') \leq \beta(\mathcal{V}|\text{1-vspan}(\mathcal{V}'))$ . Hence  $\beta(\mathcal{V}|\text{1-vspan}(\mathcal{V}')) = \beta(\mathcal{V}|\mathcal{V}')$  as needed.

□

**Proposition 6.** For any  $\Pi \in \mathbb{I}$ ,  $\mathcal{V}, \mathcal{V}' \in \mathbb{V}$  and  $\epsilon \in \bar{\mathbb{R}}^+$ , it follows that

$$\mathcal{M}^k(\Pi, \mathcal{V}; \epsilon) \subseteq \mathcal{M}^k(\Pi, \mathcal{V}'; \epsilon + 2\gamma^k \beta(\mathcal{V}|\mathcal{V}')),$$

moreover, if  $\mathcal{V}$  is convex and compact, we obtain:

$$\mathcal{M}^k(\Pi, \mathcal{V}; \epsilon) \subseteq \mathcal{M}^k(\Pi, \text{1-vspan}(\mathcal{V}'); \epsilon + 2\gamma^k \beta(\mathcal{V}|\mathcal{V}')).$$

*Proof.* Fix an arbitrary model  $\tilde{m} \in \mathcal{M}^k(\Pi, \mathcal{V}; \epsilon)$  and any  $\pi \in \Pi$ . We now select some  $v' \in \mathcal{V}'$  and examine the tolerance with which  $\tilde{m}$  is value equivalent with respect to  $\{\pi\}$  and  $\{v'\}$ .

Notice that for any  $v \in \mathcal{V}$  we can write

$$\begin{aligned}
\|\tilde{\mathcal{T}}_\pi^k v' - \mathcal{T}_\pi^k v'\| &= \|\tilde{\mathcal{T}}_\pi^k v' - \mathcal{T}_\pi^k v' + \tilde{\mathcal{T}}_\pi^k v - \tilde{\mathcal{T}}_\pi^k v\| \\
&\leq \|\tilde{\mathcal{T}}_\pi^k v' - \tilde{\mathcal{T}}_\pi^k v\| + \|\tilde{\mathcal{T}}_\pi^k v - \mathcal{T}_\pi^k v'\| \\
&= \|\tilde{\mathcal{T}}_\pi^k v' - \tilde{\mathcal{T}}_\pi^k v\| + \|\tilde{\mathcal{T}}_\pi^k v - \mathcal{T}_\pi^k v' + \mathcal{T}_\pi^k v - \mathcal{T}_\pi^k v\| \\
&\leq \|\tilde{\mathcal{T}}_\pi^k v' - \tilde{\mathcal{T}}_\pi^k v\| + \|\tilde{\mathcal{T}}_\pi^k v - \mathcal{T}_\pi^k v\| + \|\mathcal{T}_\pi^k v - \mathcal{T}_\pi^k v'\| \\
&\stackrel{(1)}{\leq} 2\gamma^k \|v' - v\| + \|\tilde{\mathcal{T}}_\pi^k v - \mathcal{T}_\pi^k v\| \\
&\stackrel{(2)}{\leq} 2\gamma^k \|v' - v\| + \epsilon
\end{aligned} \tag{29}$$

where (1) follows from the Bellman operators  $\tilde{\mathcal{T}}_\pi$  and  $\mathcal{T}_\pi$  being contractions and (2) follows the assumption that  $\tilde{m} \in \mathcal{M}^k(\Pi, \mathcal{V})$ .

Since the above upper bound on  $\|\tilde{\mathcal{T}}_\pi^k v' - \mathcal{T}_\pi^k v'\|$  holds for any  $v \in \mathcal{V}$  we can write that

$$\|\tilde{\mathcal{T}}_\pi^k v' - \mathcal{T}_\pi^k v'\| \leq \epsilon + 2\gamma^k \min_{v \in \mathcal{V}} \|v' - v\|. \tag{30}$$

Thus far we have shown that  $\mathcal{M}^k(\Pi, \mathcal{V}; \epsilon) \subseteq \mathcal{M}^k(\Pi, \{v'\}; \epsilon + 2\gamma^k \min_{v \in \mathcal{V}} \|v' - v\|)$ . To find a tolerance that holds for all  $v' \in \mathcal{V}'$  we simply take a maximum over the element-wise tolerance:

$$\max_{v' \in \mathcal{V}'} \epsilon + 2\gamma^k \min_{v \in \mathcal{V}} \|v' - v\| = \epsilon + 2\gamma^k \beta(\mathcal{V} \|\mathcal{V}'\|) \tag{31}$$

This completes the proof.  $\square$

**Theorem 2.** For any  $\tilde{m} \in \mathcal{M}^k(\Pi, \mathcal{V}; \epsilon)$  it follows that

$$\|v_* - v_{\tilde{\pi}_*}\| \leq \frac{2}{1-\gamma^k} \cdot \min_{c \geq 1} (c \cdot \epsilon + 2\gamma^k \beta(c \cdot \text{vspan}(\mathcal{V}) \|\mathbb{V}_\Pi\|)), \tag{17}$$

where  $\tilde{\pi}_*$  is an optimal policy of  $\tilde{m}$ .

*Proof.* From Theorem 1, we know by tolerating an error of

$$\epsilon' = \frac{1}{1-\gamma^k} \min_{c \geq 1} (c \cdot \epsilon + 2\gamma^k \beta(c \cdot \text{vspan}(\mathcal{V}) \|\mathbb{V}_\Pi\|)),$$

that  $\mathcal{M}^k(\Pi, \mathcal{V}; \epsilon) \subseteq \mathcal{M}^\infty(\Pi; \epsilon')$ . Thus  $\mathcal{E}_\epsilon(\Pi, \mathcal{V}, k \mid \Pi, \infty) \leq \epsilon'$ . By applying Proposition 2, we obtain  $\|v_* - v_{\tilde{\pi}_*}\| \leq 2\epsilon'$  as needed.  $\square$

**Corollary 3.** Let  $\hat{\mathbb{V}}_\Pi = \{\hat{v}_\pi : \pi \in \Pi\}$  be a set of approximate value functions satisfying  $\|v_\pi - \hat{v}_\pi\| \leq \epsilon_{\text{approx}}$  for all  $\pi \in \Pi$ . Then for any  $\tilde{m} \in \mathcal{M}^k(\Pi, \hat{\mathbb{V}}_\Pi; \epsilon)$  it follows that:

$$\|v_* - v_{\tilde{\pi}_*}\| \leq \frac{2(\epsilon + 2\gamma^k \epsilon_{\text{approx}})}{1 - \gamma^k},$$

where  $\tilde{\pi}_*$  is any optimal policy in  $\tilde{m}$ .

*Proof.* From the definition of  $\hat{\mathbb{V}}_\Pi$ , we know that  $\beta(\mathbb{V}_\Pi \|\hat{\mathbb{V}}_\Pi\|) \leq \epsilon_{\text{approx}}$ . Thus by Proposition 6 and Corollary 1 we know that

$$\mathcal{M}^k(\Pi, \hat{\mathbb{V}}_\Pi; \epsilon) \subseteq \mathcal{M}^k(\Pi, \mathbb{V}_\Pi; \epsilon + 2\gamma^k \epsilon_{\text{approx}}) \subseteq \mathcal{M}^\infty(\Pi; \frac{\epsilon + 2\gamma^k \epsilon_{\text{approx}}}{1 - \gamma^k}),$$

thus  $\mathcal{E}_\epsilon(\Pi, \hat{\mathbb{V}}_\Pi, k \mid \Pi, \infty) \leq \frac{\epsilon + 2\gamma^k \epsilon_{\text{approx}}}{1 - \gamma^k}$ , which gives us the desired performance bound by an application of Theorem 2.  $\square$
